# Supplementary material for: An Adcy3 coding mutation causes partial loss of enzymatic function, contributing to obesity in a rat model by reducing lipolysis
Source: Research Square preprint supplement (doi:10.21203/rs.3.rs-8309561/v1), 2026-01-09

**An *Adcy3* coding mutation causes partial loss of enzymatic function, contributing to obesity in a rat model by reducing lipolysis**

Mackenzie K. Fitzpatrick<sup>1</sup>, Osborne Seshie<sup>1</sup>, Christina Scott<sup>1</sup>, Anusha Vora<sup>1</sup>, Mary E. Seramur<sup>1</sup>, Angela Beeson<sup>1</sup>, Leighelle Adrian<sup>1</sup>, Michael Grzybowski<sup>2</sup>, Jason Klotz<sup>2</sup>, Aron M. Geurts<sup>2</sup>, Chia-Chi Key<sup>\*1,3</sup>, Leah C. Solberg Woods<sup>\*1</sup>

<sup>1</sup>Department of Internal Medicine, Section on Molecular Medicine, Wake Forest University School of Medicine, Winston-Salem NC, USA

<sup>2</sup>Department of Physiology, Medical College of Wisconsin, Milwaukee WI, USA

<sup>3</sup>Department of Internal Medicine, Section on Pulmonary, Critical Care, Allergy & Immunologic Diseases, Wake Forest University School of Medicine, Winston-Salem NC, USA

\*These authors contributed equally to this work

Corresponding authors: Leah C. Solberg Woods and Chia-Chi Chuang Key

1 Medical Center Drive, Winston Salem, NC, 27157

Leah.solbergwoods@advocatehealth.org, chiachi.key@wfusm.edu, 336-716-6062

## **Supplemental Figures**

### **Figure S1. Body weight curves and tissue weights at sac in Adcy3<sup>mut/mut</sup> vs WT rats. (a)**

Adcy3<sup>mut/mut</sup> males (M) and females (F) gain more weight than wild-type (WT) rats during the study. (b) Adcy3<sup>mut/mut</sup> M and F have more retroperitoneal fat (RetroFat), gonadal fat, and omental fat (OmenFat) than WT rats at necropsy. (c) Adcy3<sup>mut/mut</sup> M both have larger pancreas at necropsy than WT M with no significant differences in the necropsy weights of the other non-adipose tissues. Mean  $\pm$  SEM. T-test or rmANOVA, \*p<0.05, \*\*p<0.01, \*\*\*p<0.001, \*\*\*\*p<0.0001

### **Figure S2. *Ex vivo* cAMP production in response to stimulation with a $\beta$ 3-AR agonist in**

**RetroFat of Adcy3<sup>mut/mut</sup> vs WT rats, separated by diet. (a)** cAMP production in response to  $\beta$ 3-AR agonist in RetroFat is blunted in males (M) on high fat diet (HFD) for nine weeks relative to those on standard diet (SD) (p=0.042) (b) There is not a significant effect of diet in females (F). Mean  $\pm$  SEM. rmANOVA

### **Figure S3. Body weight curves, fat and lean mass, tissue weights at sac, fasting serum FFA**

**and body temperature during acute cold exposure in Adcy3<sup>+/-</sup> vs WT rats. (a)** Adcy3<sup>+/-</sup> males (M) and females (F) gain more weight than wild-type (WT) rats during the study. (b) Adcy3<sup>+/-</sup> M and F have increased fat mass with no differences in lean mass relative to WT rats. (c) Adcy3<sup>+/-</sup> M and F have more retroperitoneal fat (RetroFat), gonadal fat, and omental fat (OmenFat) than WT rats at necropsy. (d) Adcy3<sup>+/-</sup> M have larger pancreas at necropsy than wild-type (WT) M with no significant differences in the necropsy weights of any other non-adipose tissues. (e) During a 48-hour fast, Adcy3<sup>+/-</sup> M and F have less serum FFA than WT rats as shown by a significant genotype by time interaction in the two-way ANOVA. (f) During an acute 5-hour cold

exposure at 4°C, there were no significant differences in body temperature between Adcy3<sup>+/-</sup> M and WT M. Adcy3<sup>+/-</sup> F maintain a significantly lower body temperature during acute cold exposure than WT F. Mean ± SEM. T-test or rmANOVA, \*p<0.05, \*\*p<0.01, \*\*\*p<0.001, \*\*\*\*p<0.0001

**Figure S4. Gene expression changes in retroperitoneal fat (RetroFat), subcutaneous white adipose tissue (SubQ), and brown adipose tissue (BAT) in Adcy3<sup>+/-</sup> vs WT rats.** (a) After a prolonged 48-hour cold exposure at 4°C, Adcy3<sup>+/-</sup> males (M) and females (F) generally have lower lipase gene expression (*Lipase E (Lipe)* and *Patatin-like phospholipase domain containing 2 (Pnpla2)*) in retroperitoneal adipose (RetroFat) and subcutaneous adipose (SubQ) than wild-type (WT) rats, as shown by both three-way ANOVA (results on legend) and stratified analyses (results in graph). There are no genotypic differences in general lipase gene expression in brown adipose tissue (BAT) after prolonged cold exposure, except that Adcy3<sup>+/-</sup> M express less *Pnpla2* than WT rats. (b) After a prolonged 48-hour cold exposure at 4°C, there were no significant differences in *Uncoupling protein 1 (Ucp1)* expression in Adcy3<sup>+/-</sup> M or F in BAT or SubQ. (c) After standard necropsy (no cold exposure), there were no significant differences in *Peroxisome proliferator-activated receptor gamma (Pparg)* expression in RetroFat between genotypes in males, while Adcy3<sup>+/-</sup> F express less *Pparg* than WT F. There were also no significant differences in *CCAAT/enhancer-binding protein alpha (Cebpa)* expression in RetroFat between genotypes in either sex. Mean ± SEM. T-test, \*p<0.05, \*\*\*p<0.001

**Table S1. Primer sequences used in rt-qPCR.**

| <b>Primer</b>                   | <b>Forward Sequence</b> | <b>Reverse Sequence</b> |
|---------------------------------|-------------------------|-------------------------|
| <i><math>\beta</math>-actin</i> | TGAGGTAGTCTGTCAGGTCCCG  | ACCACTGGCATTGTGATGGACT  |
| <i>Ucp1</i>                     | GCAGAACACAGGTCTGGATG    | ACGATCGTGCCTCTTCACTG    |
| <i>Lipe</i>                     | AACTCACCTGACCGTGAAC     | CTTTGTTTCGCCTGTGGGTAT   |
| <i>Pnpla2</i>                   | GCACACAACGTTCTTCCTCA    | GGGTGAACTCCAGGTACCAA    |
| <i>Pparg</i>                    | AGGGCTGATCAACTTCTCCA    | GCAGGGGAATGTCTGTGTCT    |
| <i>Cebpa</i>                    | ATTCTGGTGTCTGCCTGAAAG   | CCCCCTACTCGGTAGGAAAA    |

Figure S1

a

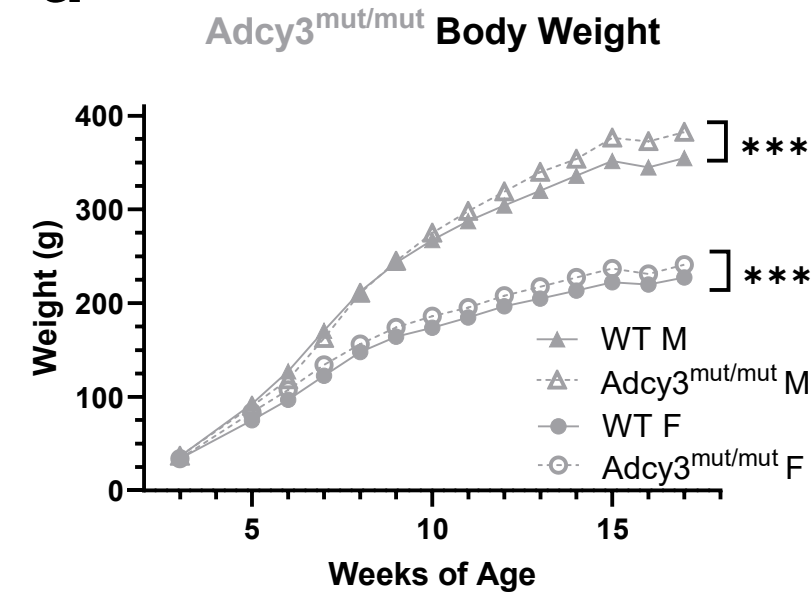

b

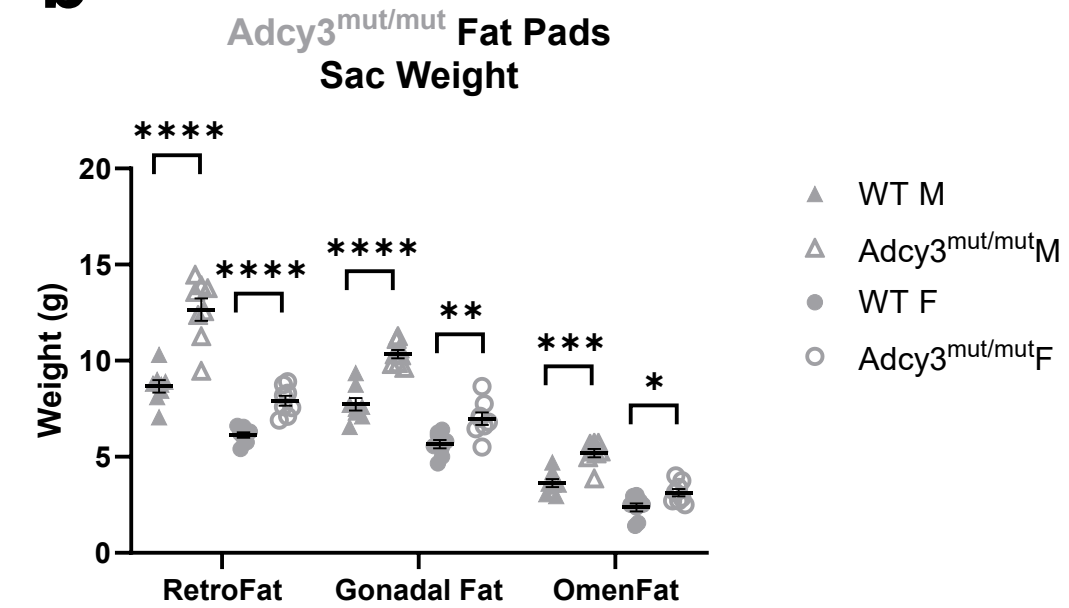

c

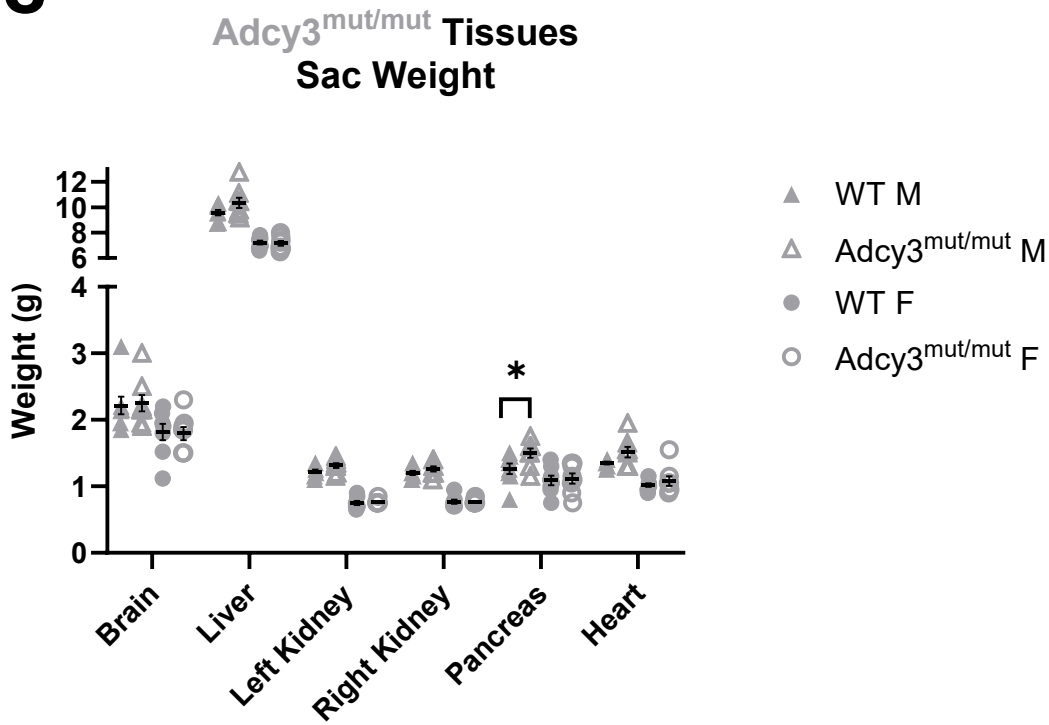

Figure S2

a

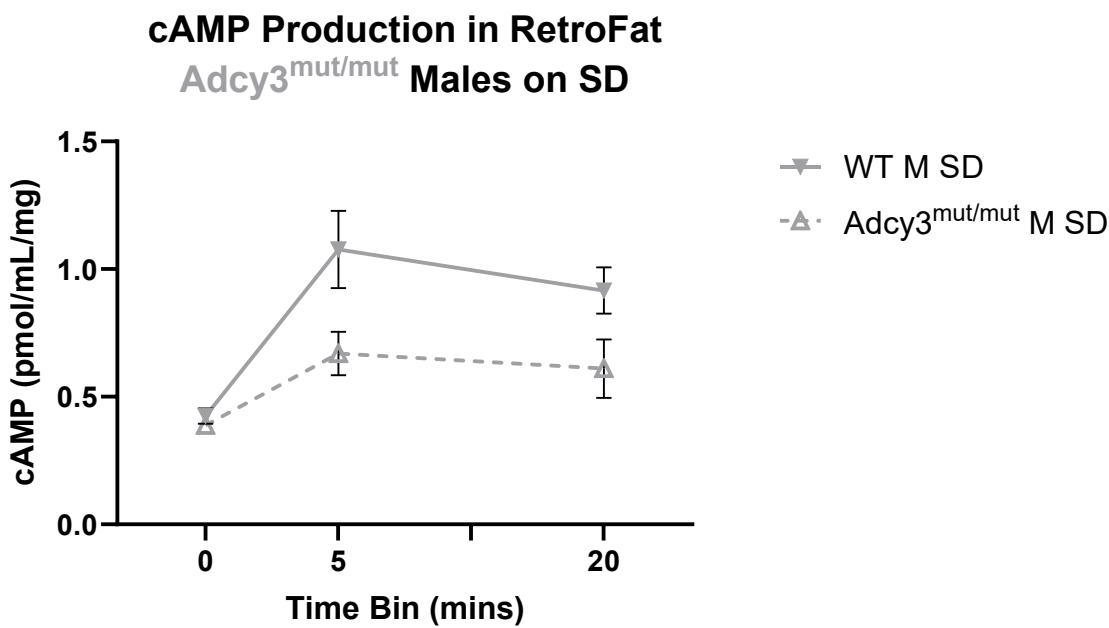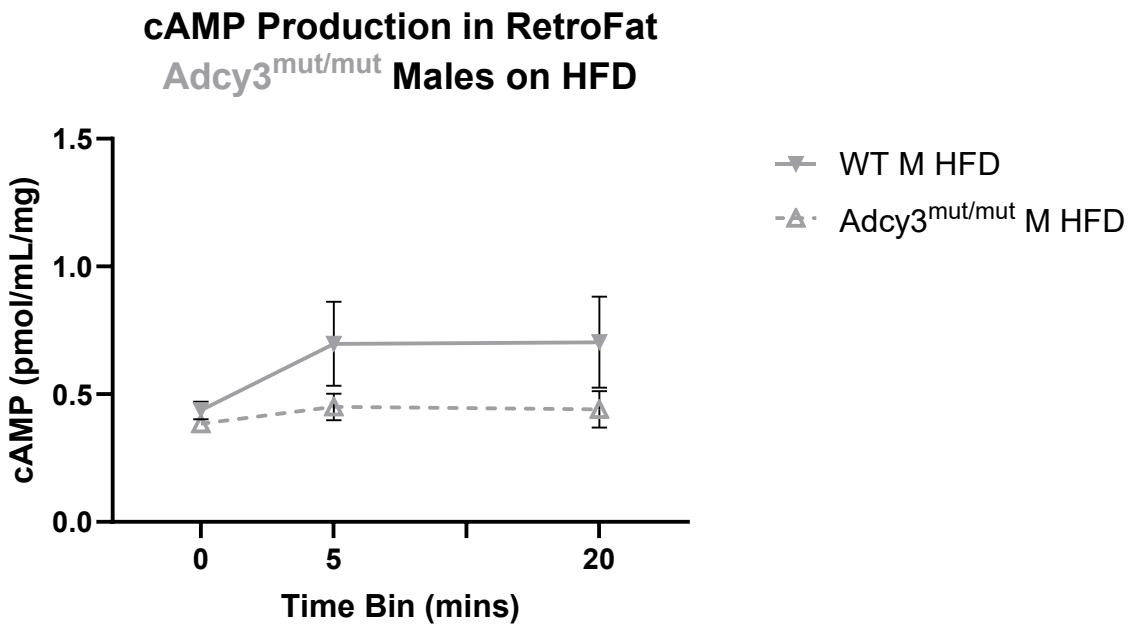

b

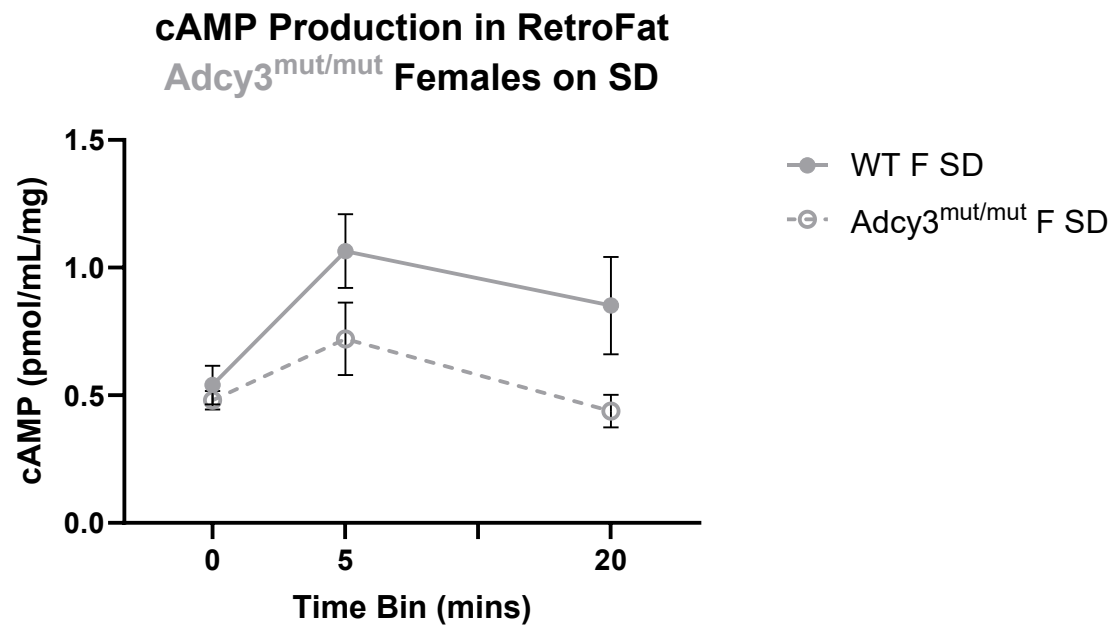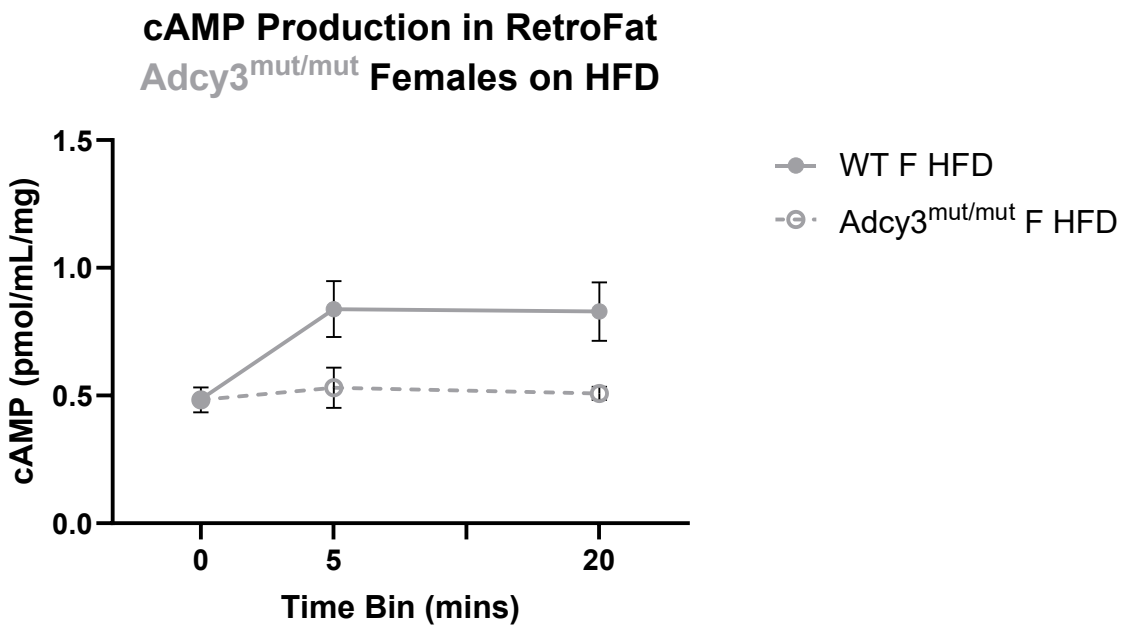

Figure S3

a

Adcy3<sup>+/-</sup> Body Weight

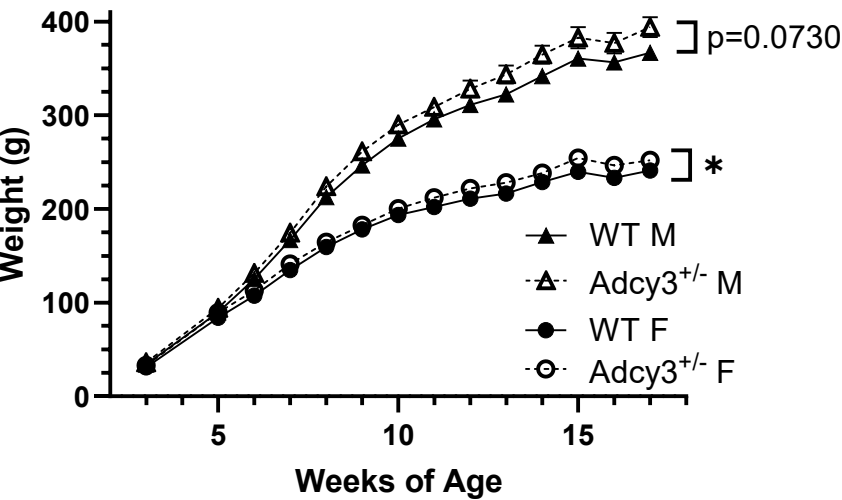

b

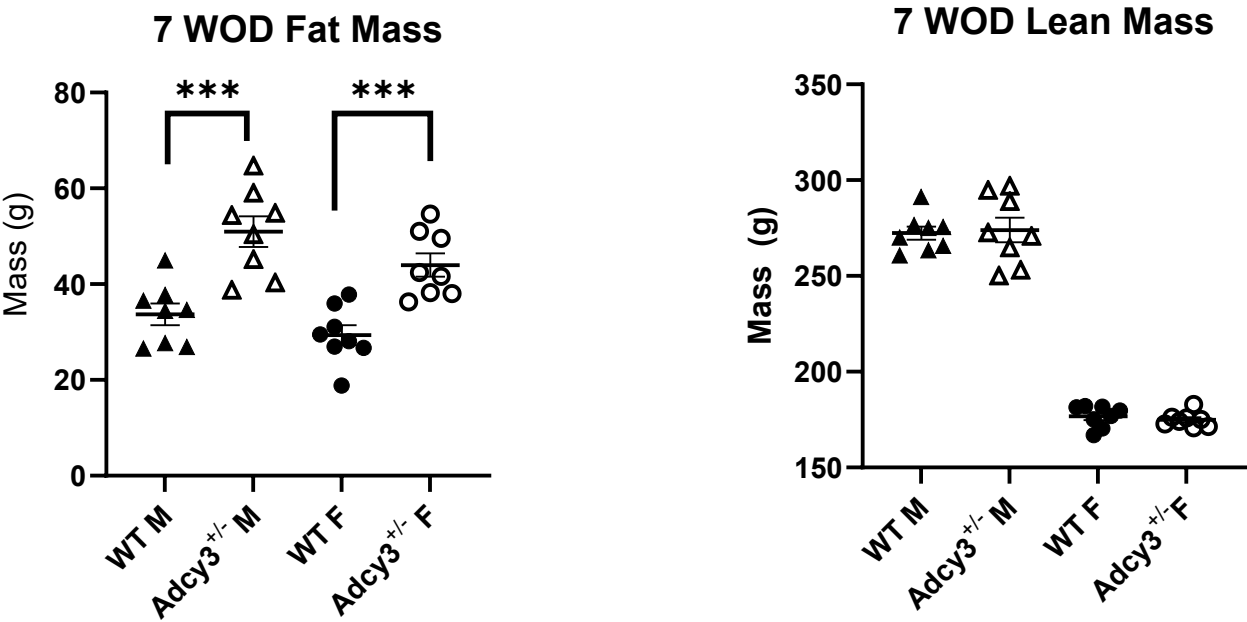

c

Adcy3<sup>+/-</sup> Fat Pads  
Sac Weight

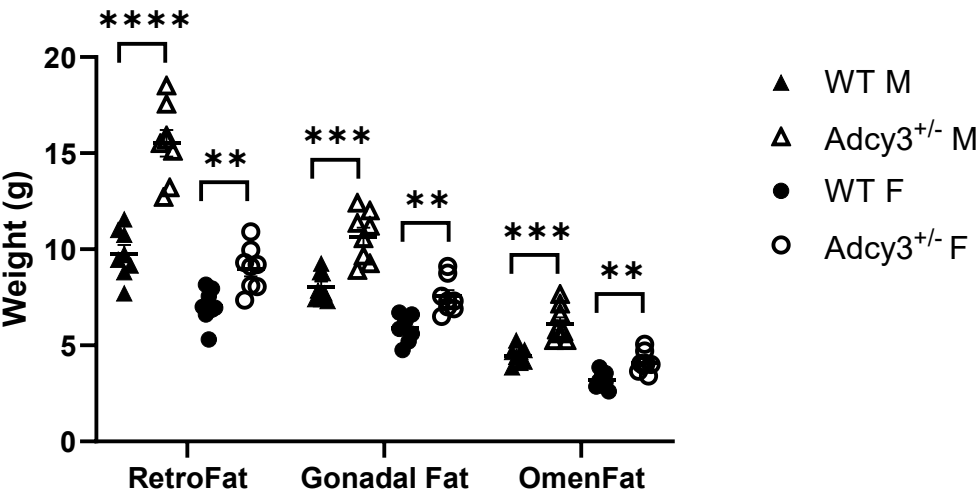

d

Adcy3<sup>+/-</sup> Tissues  
Sac Weight

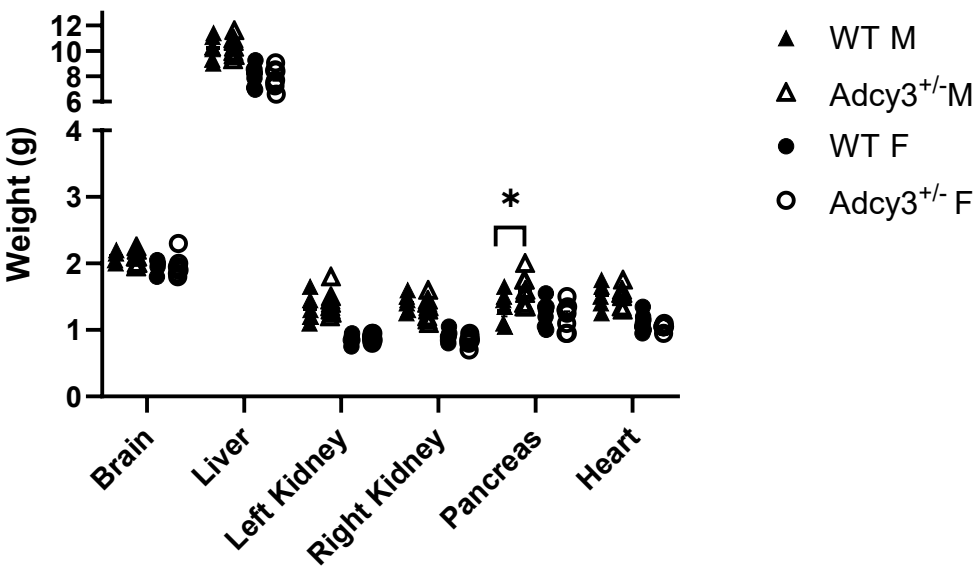

e

Fasting Serum FFA  
Adcy3<sup>+/-</sup> Males

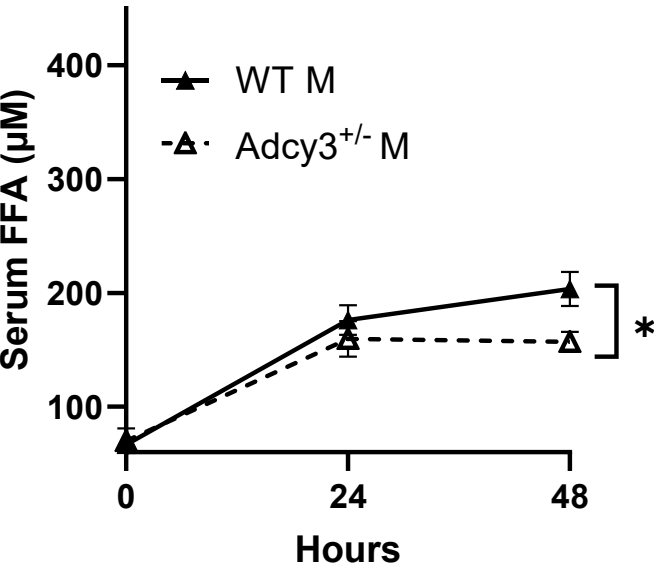

Fasting Serum FFA  
Adcy3<sup>+/-</sup> Females

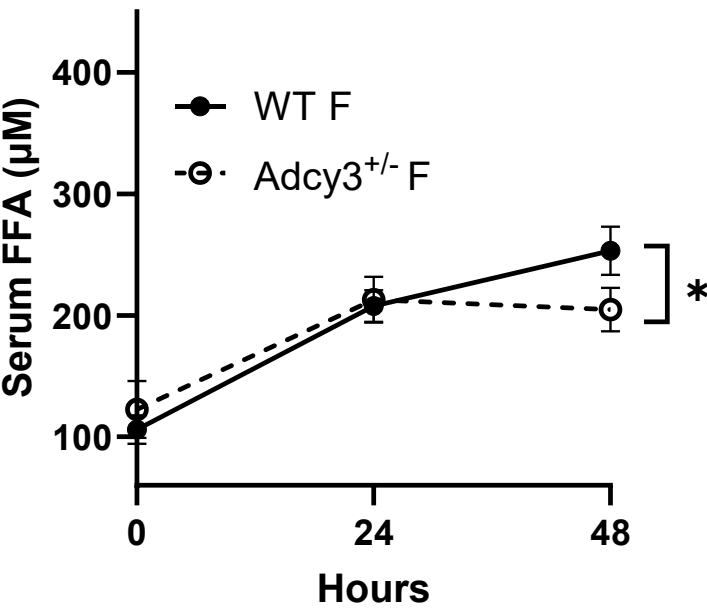

f

Acute Cold Exposure  
Adcy3<sup>+/-</sup> Males

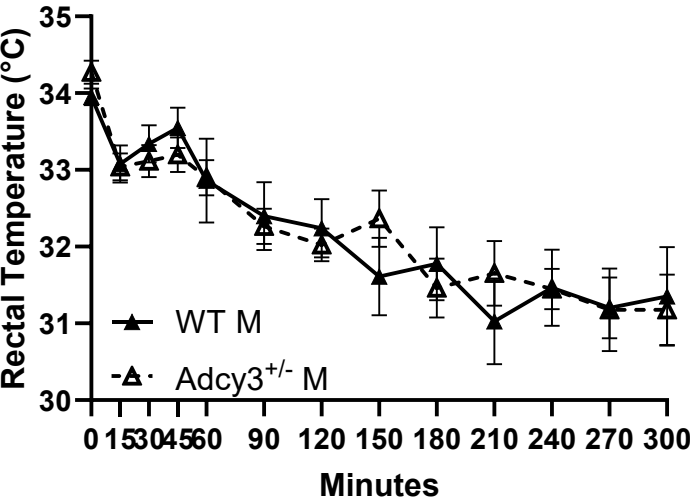

Acute Cold Exposure  
Adcy3<sup>+/-</sup> Females

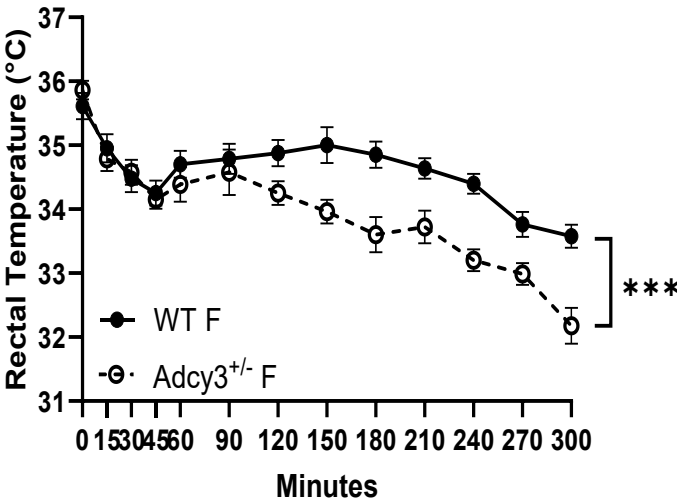

# Figure S4

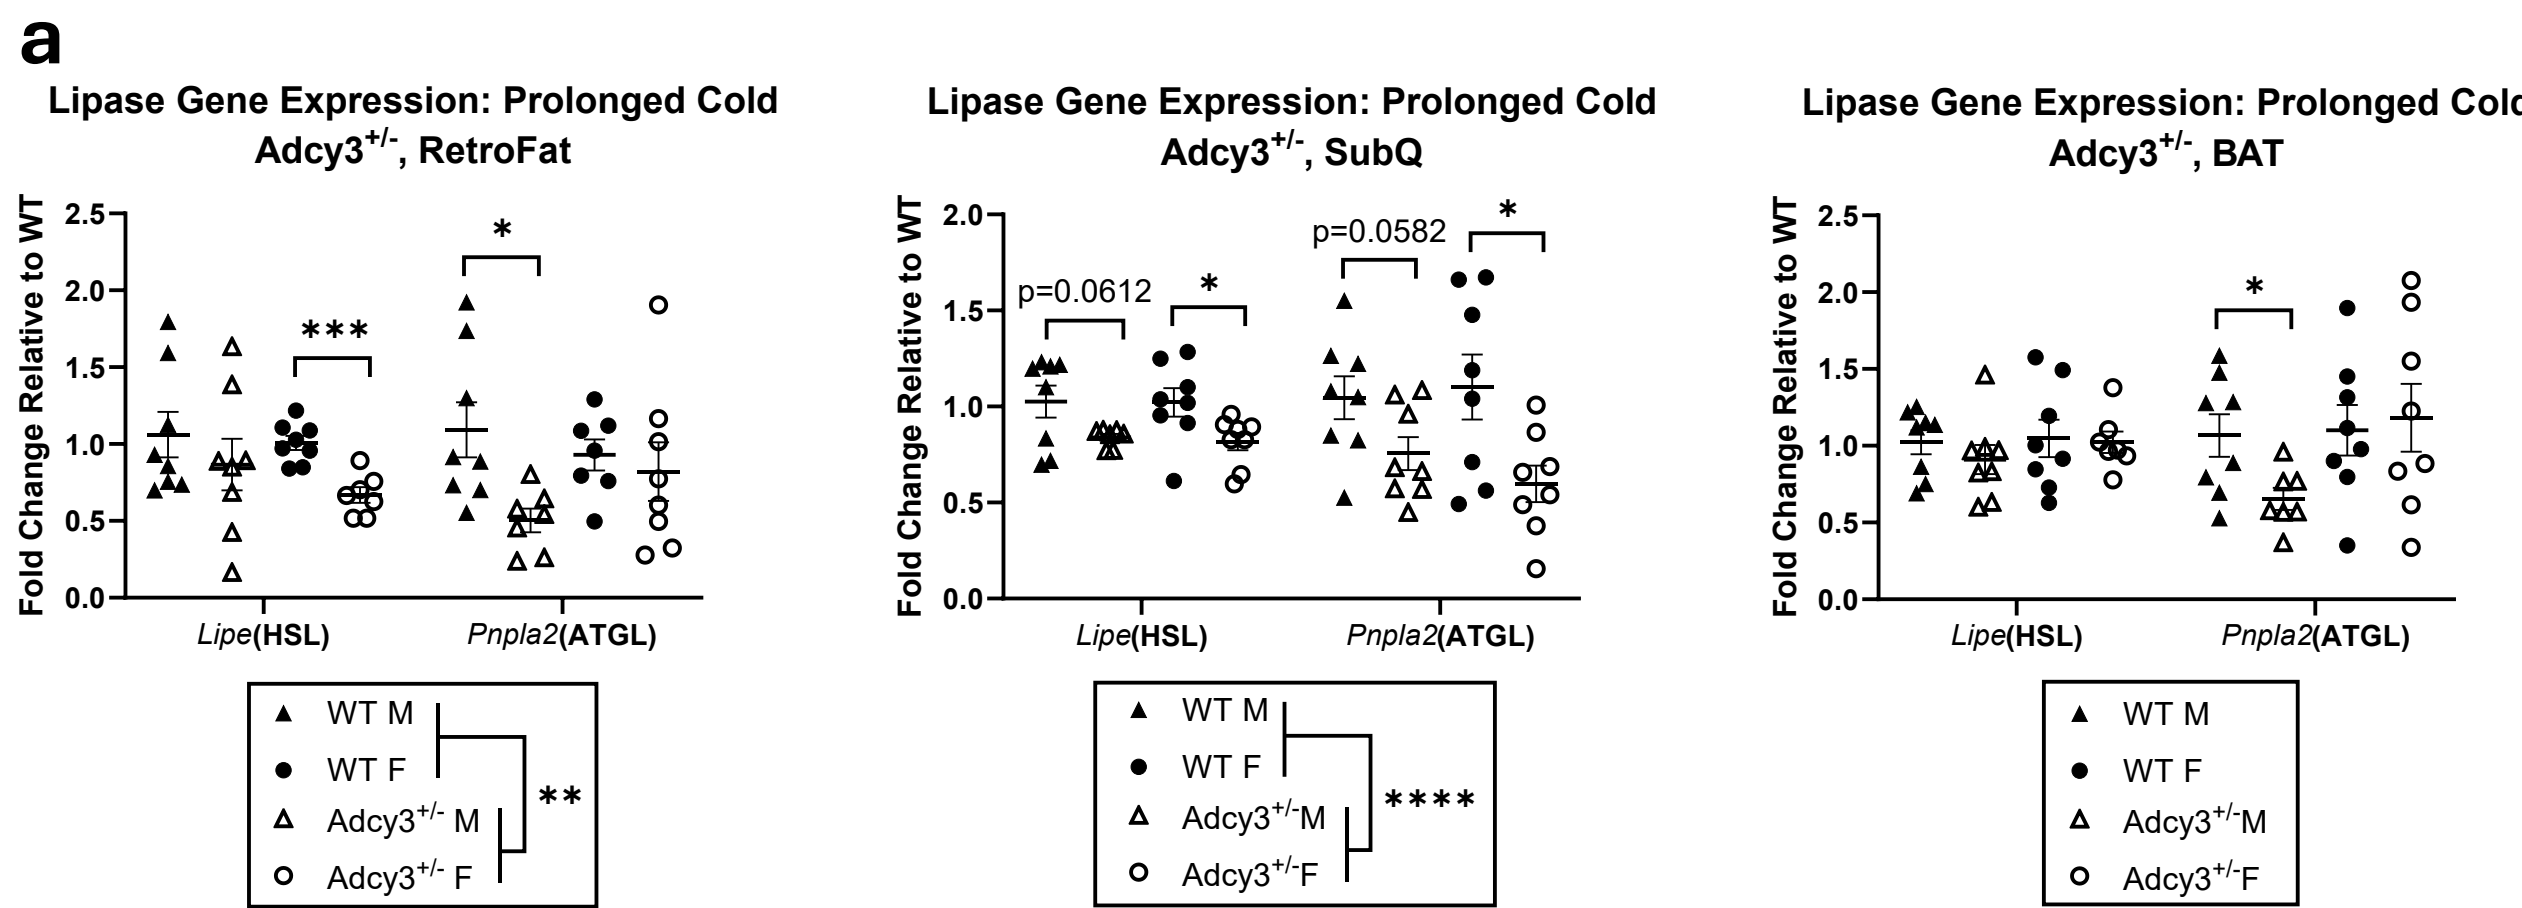

**b**

*Ucp1* Gene Expression: Prolonged Cold  
Adcy3<sup>+/-</sup>, SubQ

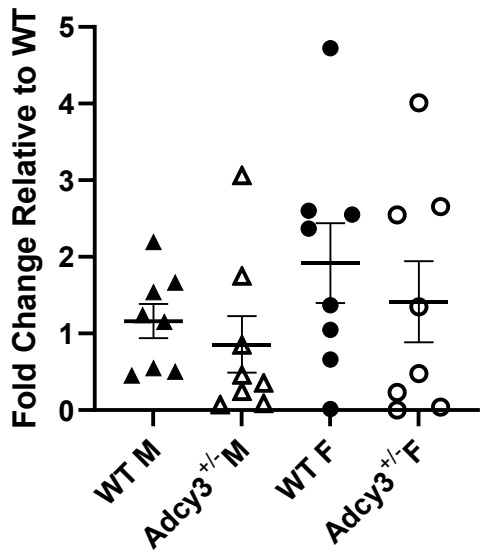

*Ucp1* Gene Expression: Prolonged Cold  
Adcy3<sup>+/-</sup>, BAT

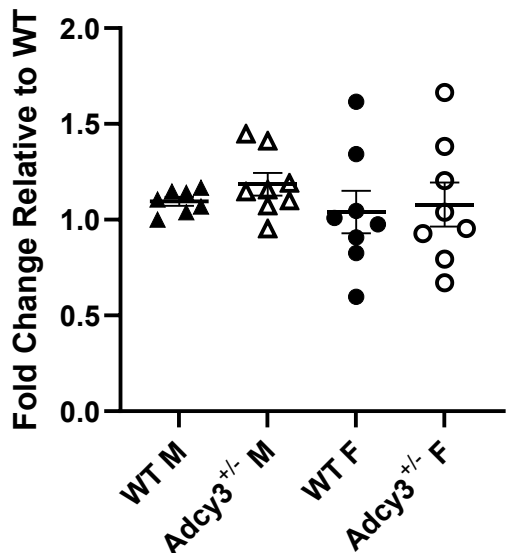

**c**

*Pparg* Gene Expression: Room Temperature  
Adcy3<sup>+/-</sup>, RetroFat

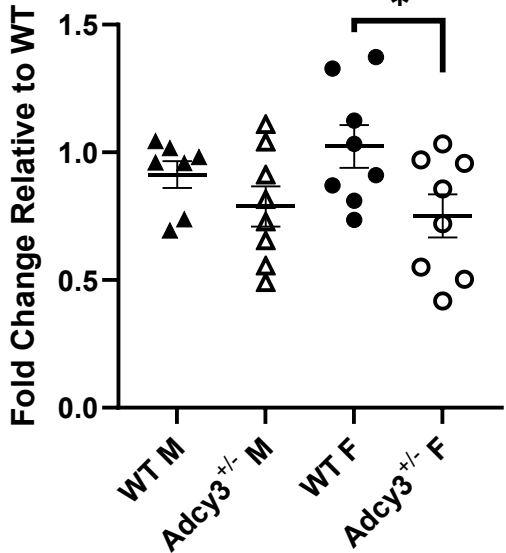

*Cebpa* Expression: Room Temperature  
Adcy3<sup>+/-</sup>, RetroFat

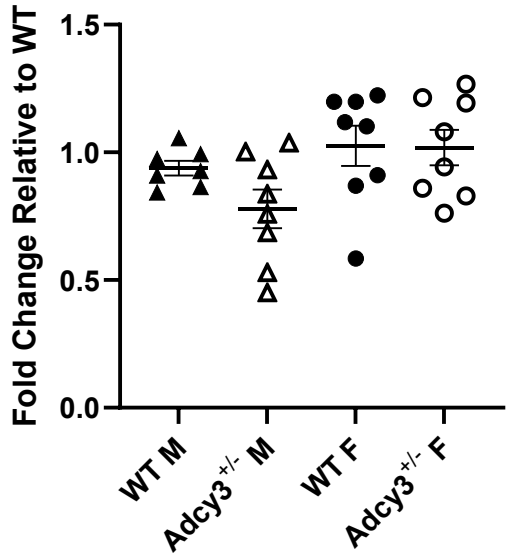

Supplement: Supplementary file 1 [file bce1eba0326241c1ab6f1a47.pdf]
